# Supplementary material for: Adsorption/desorption behavior of degradable polylactic acid microplastics on bisphenol A under different aging conditions
Source: Royal Society of Chemistry journal article supplement (doi:10.1039/d3nj03950a), 2024-01-01
Supplement: d3nj03950a1.pdf [file d3nj03950a1.pdf]

## Supplemental Information

# Adsorption/Desorption Behavior of Bisphenol A by Degradable Polylactic Acid Microplastics under different Aged Conditions

Liqing Li<sup>1</sup>, Xiumin Zhong<sup>1</sup>, Minghao Zheng<sup>1</sup>, Panwang Wu<sup>1</sup>, Fei Yu<sup>3</sup>, Shaobo  
Ouyang<sup>1\*</sup>, Jie Ma<sup>2,4\*</sup>

1 Faculty of Materials Metallurgy and Chemistry, Jiangxi University of Science and  
Technology, Ganzhou, 341000, P.R. China, E-mail: [liliqing79@126.com](mailto:liliqing79@126.com)

2 Xinjiang Key Laboratory of Novel Functional Materials Chemistry, School of  
Civil Engineering, Kashi University, Kashi 844000, China

3 College of Marine Ecology and Environment, Shanghai Ocean University, No 999,  
Huchenghuan Road, Shanghai 201306, P.R. China, E-mail: [fyu@vip.163.com](mailto:fyu@vip.163.com)

4 Research Center for Environmental Functional Materials, State Key Laboratory of  
Pollution Control and Resource Reuse, College of Environmental Science and  
Engineering, Tongji University, 1239 Siping Road, Shanghai 200092, P.R. China, E-  
mail: [jma@tongji.edu.cn](mailto:jma@tongji.edu.cn)

\*Corresponding authors: Shaobo Ouyang, E-mail: [ouyangshaobo2@163.com](mailto:ouyangshaobo2@163.com) ; Jie Ma,  
E-mail: [jma@tongji.edu.cn](mailto:jma@tongji.edu.cn)

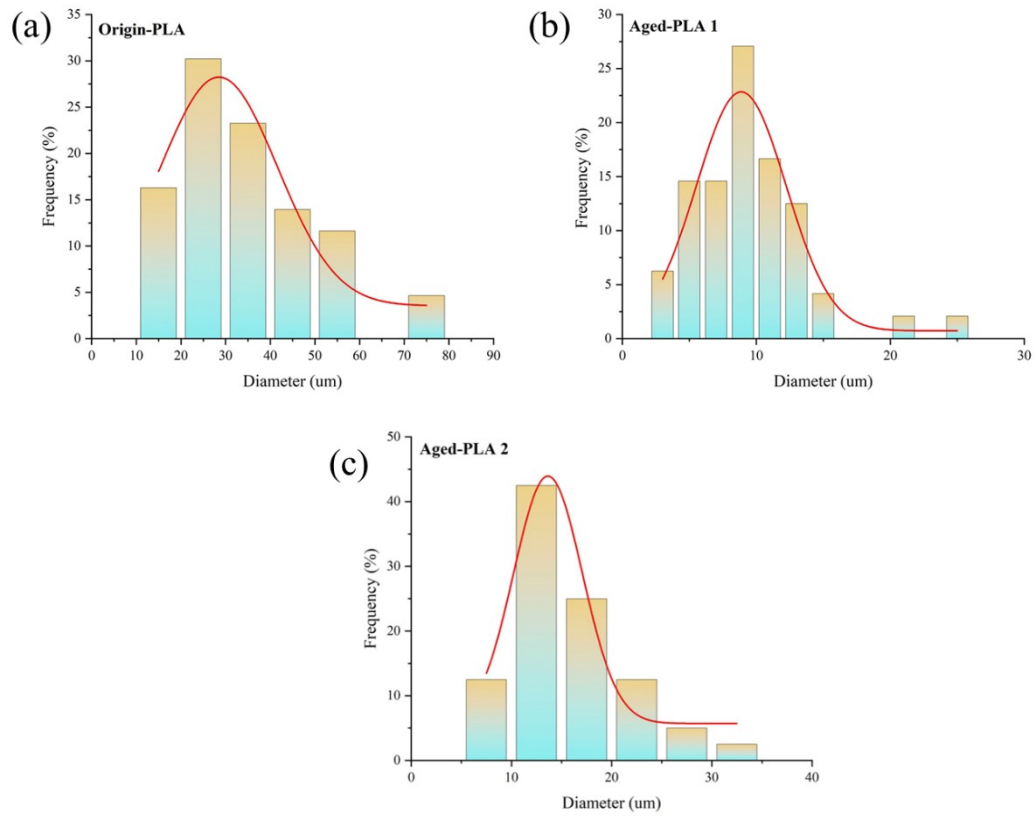

Fig. S1 Statistical analysis of particle size before and after aging

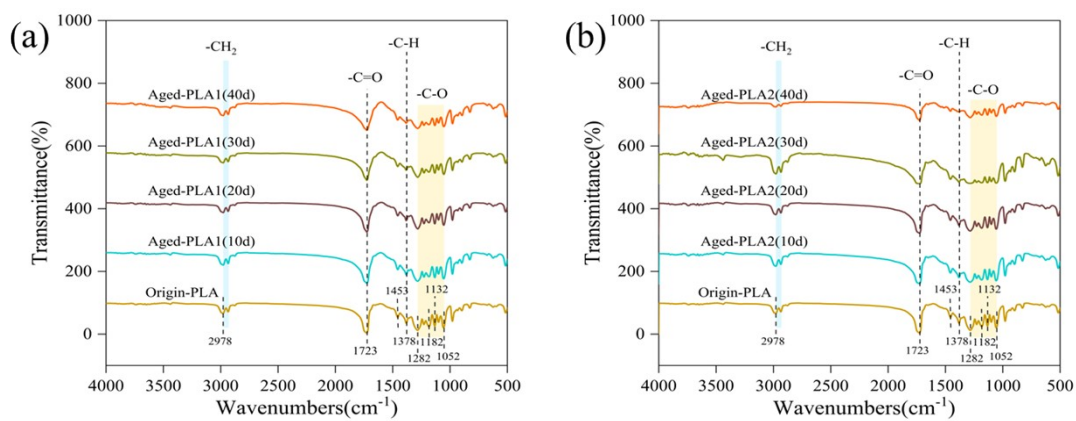

Fig. S2 FTIR spectra of PLA MPs (a) Aged-PLA 1, (b) Aged-PLA 2

Table S1 Carbonyl index (CI) of PLA MPs

| UV aging time | Carbonyl index (CI) |            |
|---------------|---------------------|------------|
|               | Aged-PLA 1          | Aged-PLA 2 |
| 0d            | 5.266               | 5.266      |
| 10d           | 4.565               | 4.021      |
| 20d           | 5.117               | 4.383      |
| 30d           | 3.726               | 3.657      |
| 40d           | 2.737               | 2.598      |

Table S2 Fitting parameters of adsorption kinetics of PLA to BPA

| Absorbent  | Pseudo-first-order                                |                       |                                                   | Pseudo-second-order                         |                                                   |         |
|------------|---------------------------------------------------|-----------------------|---------------------------------------------------|---------------------------------------------|---------------------------------------------------|---------|
|            | $K_1$<br>( $h^{-1}$ )                             | $Q_{e,cal}$<br>(mg/g) | $R^2$                                             | $K_2$<br>( $g \cdot mg^{-1} \cdot h^{-1}$ ) | $Q_{e,cal}$<br>(mg/g)                             | $R^2$   |
| Origin PLA | 2.935                                             | 10.734                | 0.474                                             | 0.209                                       | 11.087                                            | 0.837   |
| Aged PLA 1 | 3.696                                             | 9.128                 | 0.499                                             | 0.392                                       | 9.341                                             | 0.818   |
| Aged PLA 2 | 3.181                                             | 11.157                | 0.387                                             | 0.171                                       | 11.555                                            | 0.740   |
| Absorbent  | W-M Models                                        |                       |                                                   |                                             |                                                   |         |
|            | $K_{id1}$<br>( $mg \cdot g^{-1} \cdot h^{-0.5}$ ) | $R_1^2$               | $K_{id2}$<br>( $mg \cdot g^{-1} \cdot h^{-0.5}$ ) | $R_2^2$                                     | $K_{id3}$<br>( $mg \cdot g^{-1} \cdot h^{-0.5}$ ) | $R_3^2$ |
| Origin PLA | 0.818                                             | 0.972                 | 0.073                                             | 0.504                                       | -0.004                                            | 0.971   |
| Aged PLA 1 | 0.810                                             | 0.982                 | 0.220                                             | 0.901                                       | -0.151                                            | 0.754   |
| Aged PLA 2 | 0.925                                             | 0.881                 | 0.158                                             | 0.658                                       | -0.135                                            | 0.206   |

Table S3 Linear, Freundlich and D-R model parameters for adsorption of BPA on PLA with different particle sizes

| <b>Models</b>           | <b>Absorbent</b>       | <b>Parameters</b>                        |                         |                      |       |
|-------------------------|------------------------|------------------------------------------|-------------------------|----------------------|-------|
| <b>Linear Model</b>     |                        | $K_d(\text{L/g})$                        | $C$                     | $R^2$                |       |
|                         | PLA -550 $\mu\text{m}$ | 0.016                                    | -0.330                  | 0.709                |       |
|                         | PLA -150 $\mu\text{m}$ | 0.134                                    | -0.640                  | 0.968                |       |
|                         | PLA -75 $\mu\text{m}$  | 0.446                                    | 1.402                   | 0.994                |       |
|                         | PLA -45 $\mu\text{m}$  | 0.435                                    | 1.784                   | 0.992                |       |
| <b>Freundlich Model</b> |                        | $K_F((\text{ug/g})/(\text{mg/L})^{1/n})$ | $1/n$                   | $R^2$                |       |
|                         | PLA -550 $\mu\text{m}$ | $3.164 \times 10^{-10}$                  | 5.059                   | 0.979                |       |
|                         | PLA -150 $\mu\text{m}$ | 0.0254                                   | 1.378                   | 0.991                |       |
|                         | PLA -75 $\mu\text{m}$  | 0.7485                                   | 0.888                   | 0.996                |       |
|                         | PLA -45 $\mu\text{m}$  | 0.8839                                   | 0.845                   | 0.998                |       |
| <b>D-R Model</b>        |                        | $Q_m(\text{mg/g})$                       | $B$                     | $E_a(\text{kJ/mol})$ | $R^2$ |
|                         | PLA -550 $\mu\text{m}$ | 9.431                                    | $20.600 \times 10^{-4}$ | 15.579               | 0.966 |
|                         | PLA -150 $\mu\text{m}$ | 14.743                                   | $3.802 \times 10^{-4}$  | 36.262               | 0.872 |
|                         | PLA -75 $\mu\text{m}$  | 35.661                                   | $1.021 \times 10^{-4}$  | 69.973               | 0.833 |
|                         | PLA -45 $\mu\text{m}$  | 34.731                                   | $0.927 \times 10^{-4}$  | 73.449               | 0.857 |

Table S4 Fitting parameters of different models in the BPA adsorption isotherm experiment

| <b>Models</b>           | <b>Absorbent</b>  | <b>Parameters</b>                          |                       |               |       |
|-------------------------|-------------------|--------------------------------------------|-----------------------|---------------|-------|
| <b>Langmuir Model</b>   |                   | $q_m$ (mg/g)                               | $K_L$                 | $R^2$         |       |
|                         | <b>Origin PLA</b> | 212.747                                    | 0.0025                | 0.994         |       |
|                         | <b>Aged PLA 1</b> | 995.025                                    | 0.0004                | 0.998         |       |
|                         | <b>Aged PLA 2</b> | 142.128                                    | 0.0041                | 0.997         |       |
| <b>Freundlich Model</b> |                   | $K_F((\mu\text{g/g})/(\text{mg/L})^{1/n})$ | $1/n$                 | $R^2$         |       |
|                         | <b>Origin PLA</b> | 0.725                                      | 0.895                 | 0.995         |       |
|                         | <b>Aged PLA 1</b> | 0.469                                      | 0.977                 | 0.998         |       |
|                         | <b>Aged PLA 2</b> | 0.856                                      | 0.851                 | 0.998         |       |
| <b>D-R Model</b>        |                   | $q_m$ (mg/g)                               | $B$                   | $E_a$ (J/mol) | $R^2$ |
|                         | <b>Origin PLA</b> | 34.682                                     | $0.99 \times 10^{-4}$ | 70.918        | 0.812 |
|                         | <b>Aged PLA 1</b> | 33.106                                     | $1.18 \times 10^{-4}$ | 64.975        | 0.840 |
|                         | <b>Aged PLA 2</b> | 33.194                                     | $0.88 \times 10^{-4}$ | 75.221        | 0.858 |

Table S5 The equilibrium parameter dimensionless ( $R_L$ ) calculated from Langmuir equation for BPA adsorption on PLA

| MPs samples       | $R_L$ values in different concentration of BPA |        |        |        |        |        |        |        |        |
|-------------------|------------------------------------------------|--------|--------|--------|--------|--------|--------|--------|--------|
|                   | 5mg/L                                          | 10mg/L | 15mg/L | 20mg/L | 25mg/L | 30mg/L | 40mg/L | 60mg/L | 80mg/L |
| <b>Origin PLA</b> | 0.988                                          | 0.976  | 0.964  | 0.952  | 0.941  | 0.930  | 0.909  | 0.870  | 0.833  |
| <b>Aged PLA 1</b> | 0.998                                          | 0.996  | 0.994  | 0.992  | 0.990  | 0.988  | 0.984  | 0.977  | 0.969  |
| <b>Aged PLA 2</b> | 0.980                                          | 0.961  | 0.942  | 0.924  | 0.907  | 0.890  | 0.859  | 0.803  | 0.753  |



Table S6 Desorption isotherm fitting parameters of BPA by PLA in ultrapure water

| Models                            | Absorbent         | Parameters                                 |                     |                     |                     |                     |                     |
|-----------------------------------|-------------------|--------------------------------------------|---------------------|---------------------|---------------------|---------------------|---------------------|
| <b>Liner Model</b>                |                   | $K_d(\text{L/g})$                          |                     | $C$                 |                     | $R^2$               |                     |
|                                   | <b>Origin PLA</b> | 0.315                                      |                     | 1.091               |                     | 0.993               |                     |
|                                   | <b>Aged PLA 1</b> | 0.309                                      |                     | 0.698               |                     | 0.998               |                     |
|                                   | <b>Aged PLA 2</b> | 0.307                                      |                     | 1.226               |                     | 0.991               |                     |
| <b>Freundlich Model</b>           |                   | $K_F((\mu\text{g/g})/(\text{mg/L})^{1/n})$ |                     | $1/n$               |                     | $R^2$               |                     |
|                                   | <b>Origin PLA</b> | 0.548                                      |                     | 0.880               |                     | 0.997               |                     |
|                                   | <b>Aged PLA 1</b> | 0.448                                      |                     | 0.920               |                     | 0.999               |                     |
|                                   | <b>Aged PLA 2</b> | 0.579                                      |                     | 0.863               |                     | 0.998               |                     |
| <b>Desorption Hysteresis (HI)</b> |                   | $C_e=5\text{mg/L}$                         | $C_e=10\text{mg/L}$ | $C_e=20\text{mg/L}$ | $C_e=25\text{mg/L}$ | $C_e=40\text{mg/L}$ | $C_e=80\text{mg/L}$ |
|                                   | <b>Origin PLA</b> | 0.313                                      | 0.275               | 0.291               | 0.280               | 0.288               | 0.304               |
|                                   | <b>Aged PLA 1</b> | 0.204                                      | 0.156               | 0.197               | 0.180               | 0.248               | 0.267               |
|                                   | <b>Aged PLA 2</b> | 0.323                                      | 0.293               | 0.294               | 0.305               | 0.285               | 0.295               |

Table S7 Desorption isotherm fitting parameters of BPA by PLA in simulated intestinal fluid

| <b>Models</b>                         | <b>Absorben<br/>t</b>  | <b>Parameters</b>                          |                         |                         |                         |                         |       |
|---------------------------------------|------------------------|--------------------------------------------|-------------------------|-------------------------|-------------------------|-------------------------|-------|
| <b>Liner Model</b>                    |                        | $K_d(\text{L/g})$                          |                         | $C$                     |                         | $R^2$                   |       |
|                                       | <b>Origin PLA</b>      | 0.269                                      |                         | 3.064                   |                         | 0.974                   |       |
|                                       | <b>Aged PLA<br/>1</b>  | 0.327                                      |                         | 1.634                   |                         | 0.998                   |       |
|                                       | <b>Aged PLA<br/>2</b>  | 0.337                                      |                         | 2.340                   |                         | 0.994                   |       |
| <b>Freundlich Model</b>               |                        | $K_F((\mu\text{g/g})/(\text{mg/L})^{1/n})$ |                         | $1/n$                   |                         | $R^2$                   |       |
|                                       | <b>Origin PLA</b>      | 1.164                                      |                         | 0.689                   |                         | 0.997                   |       |
|                                       | <b>Aged PLA<br/>1</b>  | 0.670                                      |                         | 0.847                   |                         | 0.999                   |       |
|                                       | <b>Aged PLA<br/>2</b>  | 0.867                                      |                         | 0.800                   |                         | 0.995                   |       |
| <b>Desorption<br/>Hysteresis (HI)</b> | $C_e=5\text{m}$<br>g/L | $C_e=10\text{m}$<br>g/L                    | $C_e=20\text{m}$<br>g/L | $C_e=25\text{mg}$<br>/L | $C_e=40\text{mg}$<br>/L | $C_e=80\text{m}$<br>g/L |       |
|                                       | <b>Origin PLA</b>      | 0.082                                      | 0.112                   | 0.151                   | 0.195                   | 0.282                   | 0.358 |
|                                       | <b>Aged PLA 1</b>      | -0.222                                     | 0.049                   | 0.095                   | 0.121                   | 0.140                   | 0.199 |
|                                       | <b>Aged PLA 2</b>      | -0.023                                     | 0.126                   | 0.142                   | 0.163                   | 0.197                   | 0.175 |

Table S8 Changes in O/C ratio in PLA before and after adsorption/desorption of BPA

| Samples    | Species O/C ratio |                  |                            |                                       |
|------------|-------------------|------------------|----------------------------|---------------------------------------|
|            | Before adsorption | After adsorption | Ultrapure water desorption | Simulated intestinal fluid desorption |
| Origin-PLA | 0.8315            | 0.6636           | 0.5198                     | 0.5239                                |
| Aged-PLA 1 | 0.5962            | 0.5721           | 0.5971                     | 0.6534                                |
| Aged-PLA 2 | 0.6442            | 0.5094           | 0.3856                     | 0.2450                                |
